# Supplementary material
Source: MDPI journal article supplement (https://www.mdpi.com/2072-4292/10/2/244)
Supplement: s1 [file s1]

Surface Freshwater Limitation Explains Worst Rice Production Anomaly in India in 2002

Matteo Zampieri 1,*, Gema Carmona Garcia 1, Frank Dentener 1, Murali Krishna Gumma 2,
Peter Salamon 1, Lorenzo Seguini 1, and Andrea Toreti 1

1 EC-JRC, European Commission-Joint Research Centre, Via E. Fermi, 2749, 21027 Ispra, Italy; Gema.CARMONA-GARCIA@ec.europa.eu (G.C.G.); frank.dentener@ec.europa.eu (F.D.); peter.salamon@ec.europa.eu (P.S.); lorenzo.seguini@ec.europa.eu (L.S.); andrea.toreti@ec.europa.eu (A.T.)

2 Remote sensing/GIS Lab, Innovation Systems for the Drylands Program (ISD), International Crops Research Institute for the Semi-Arid Tropics (ICRISAT), Patancheru-502324, India; M.Gumma@cgiar.org

***** Correspondence: matteo.zampieri@ec.europa.eu; Tel.: +39-033278-5120


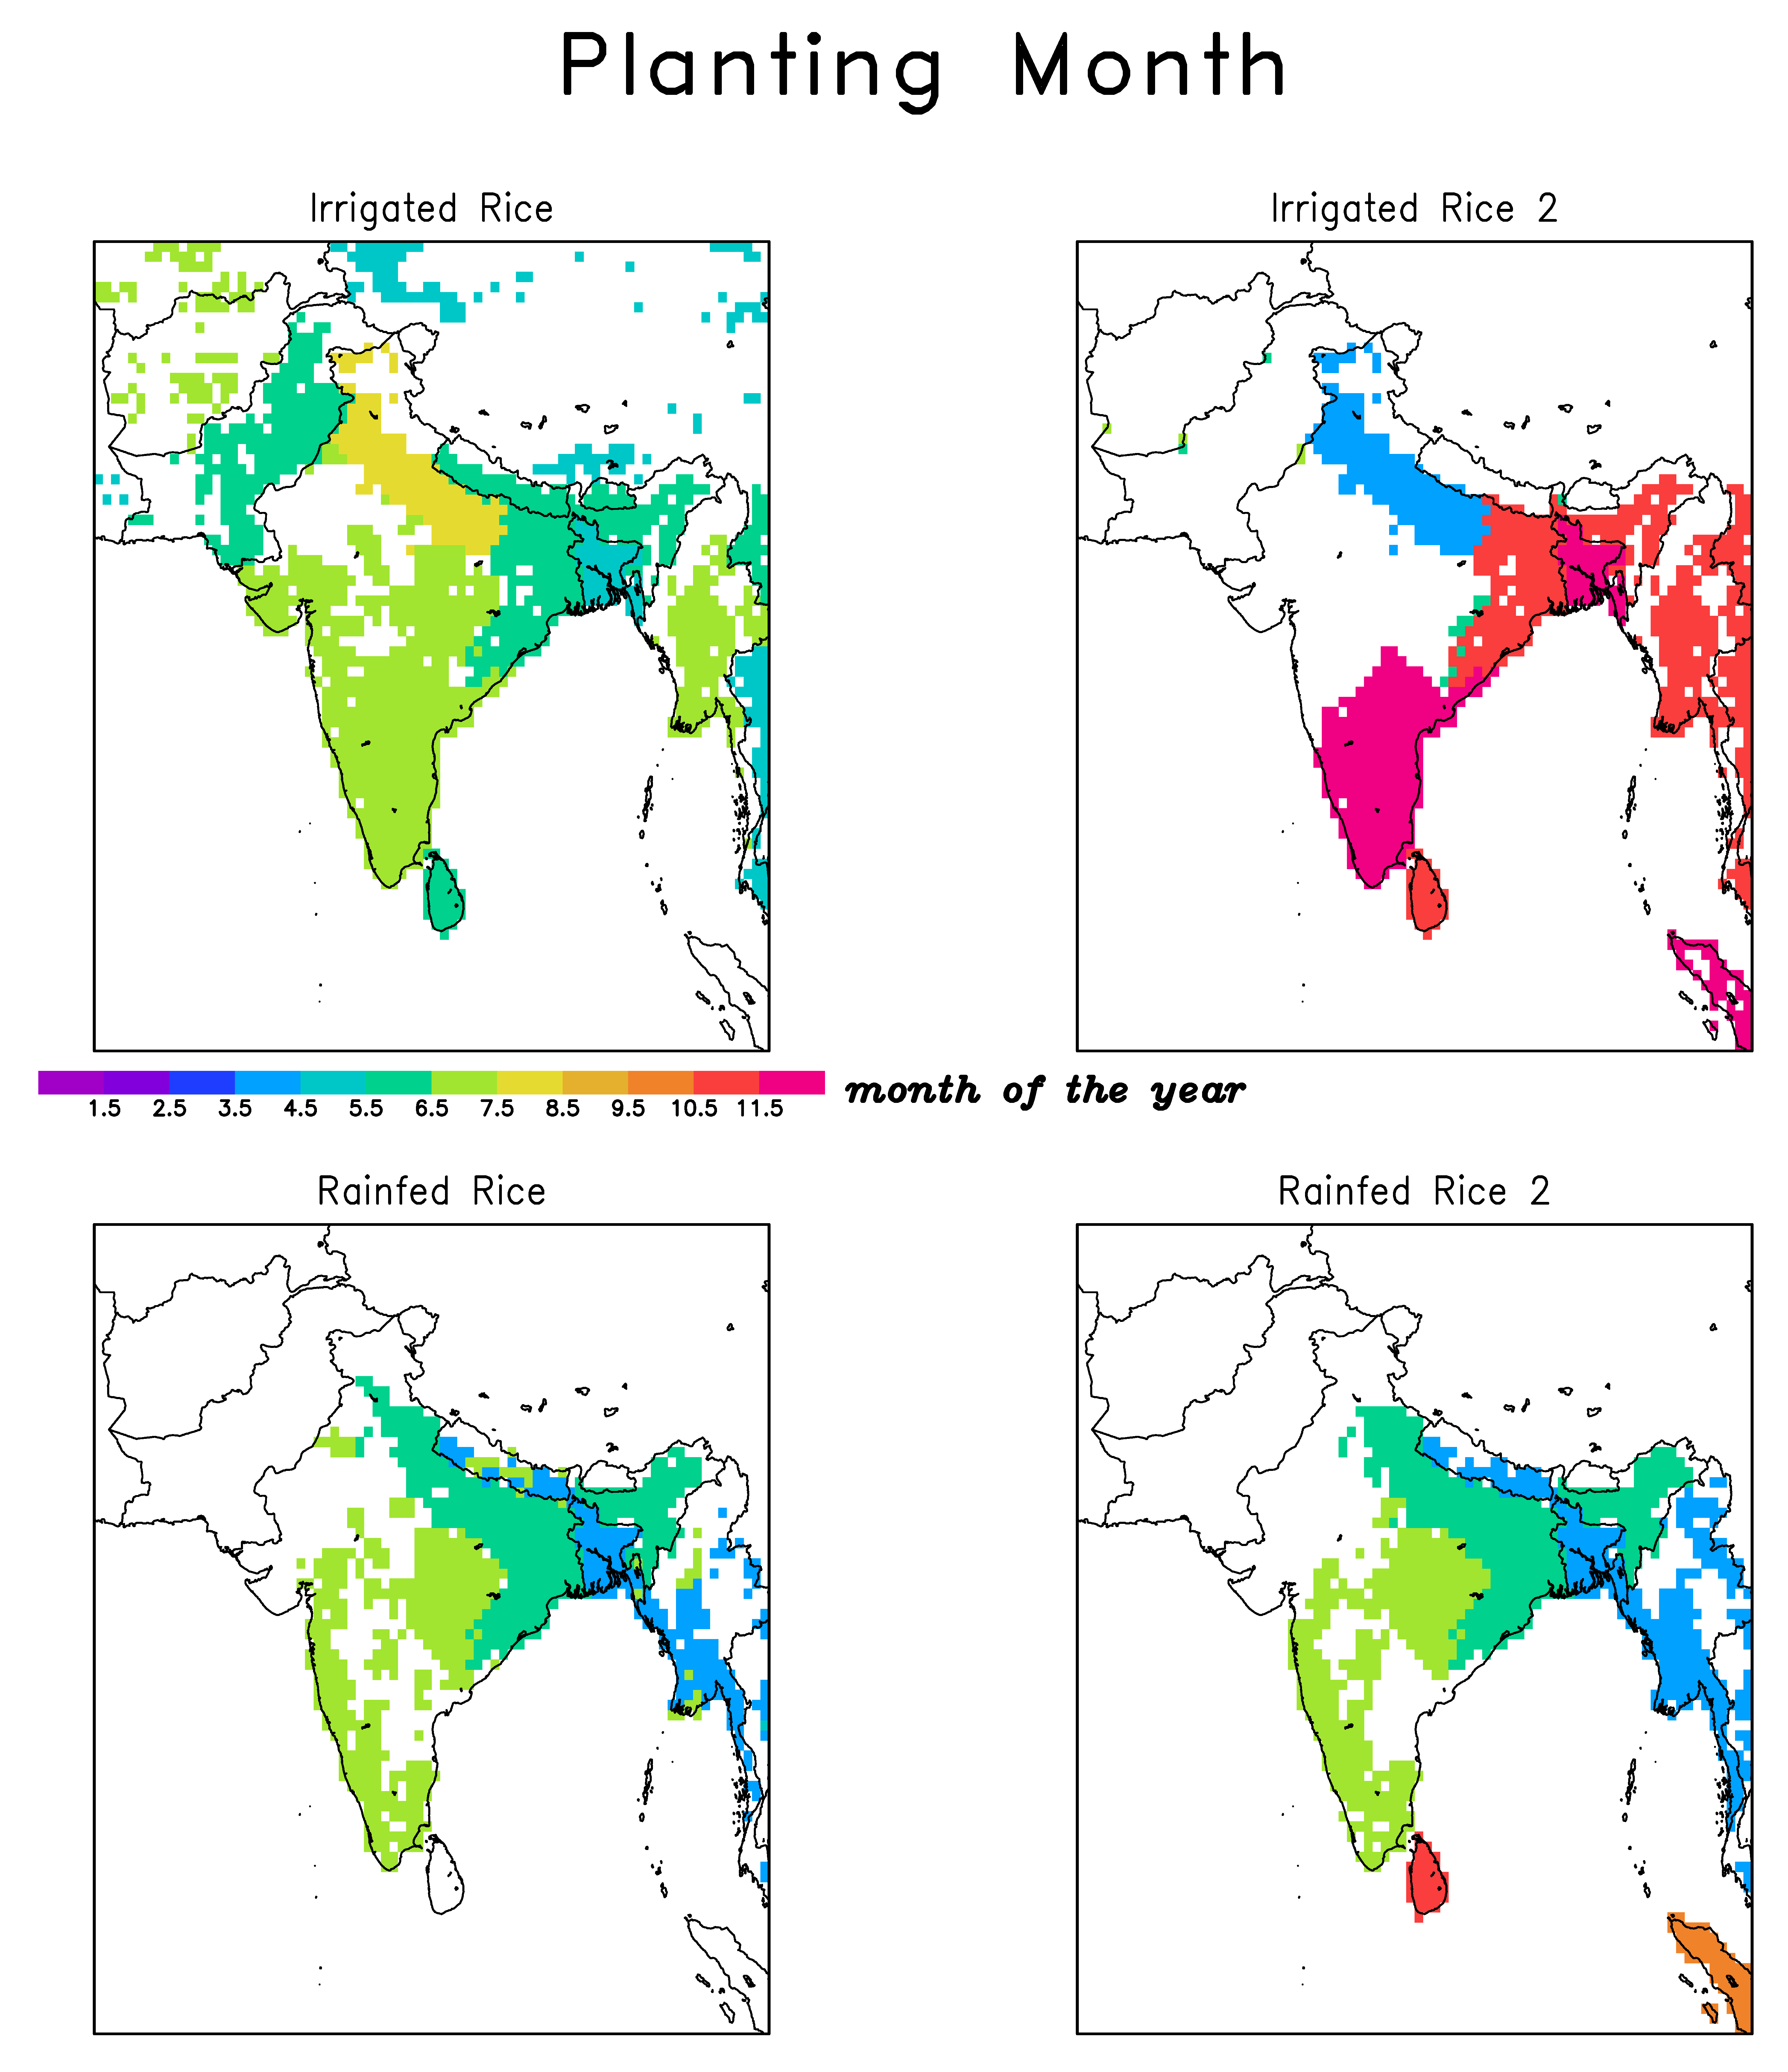


**Figure S1.** Planting months for cropping cycles and irrigated/rainfed regions: I1 (top left), I2 (top right), R1 (bottom left) and R2 (bottom right). Data from MIRCA2000 global cropping calendar.


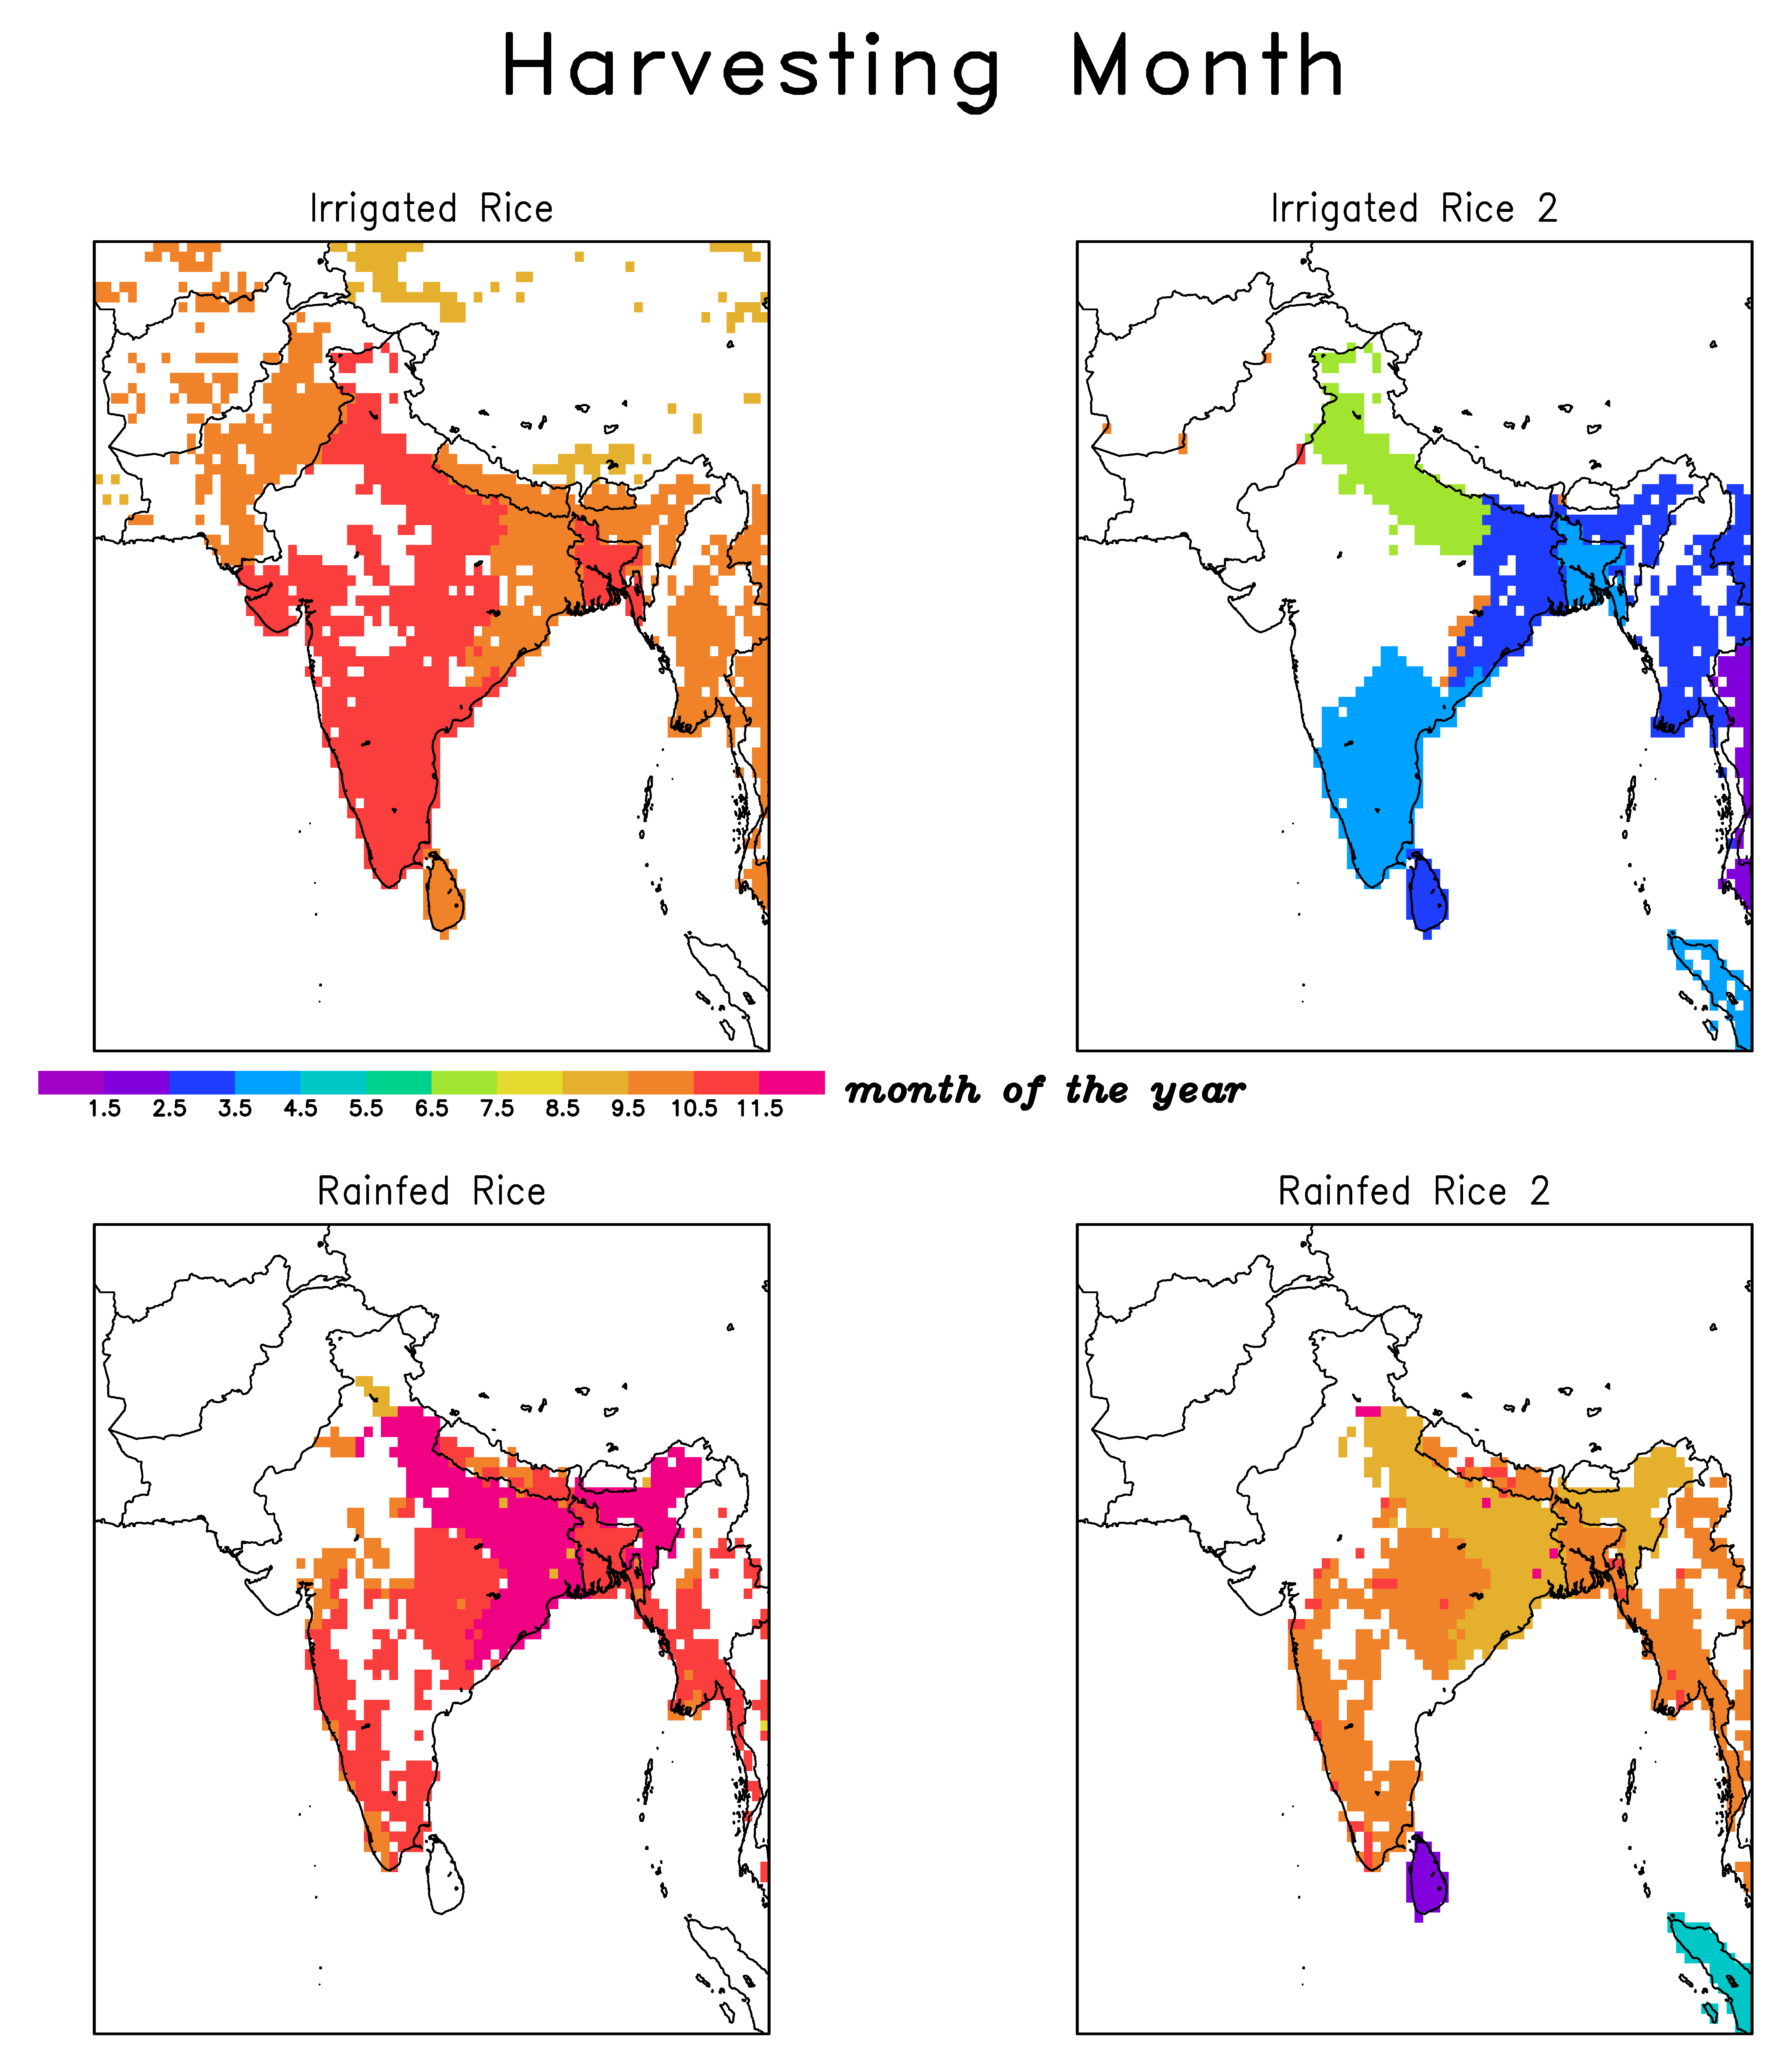


**Figure S2.** As Figure S1, but harvesting months.


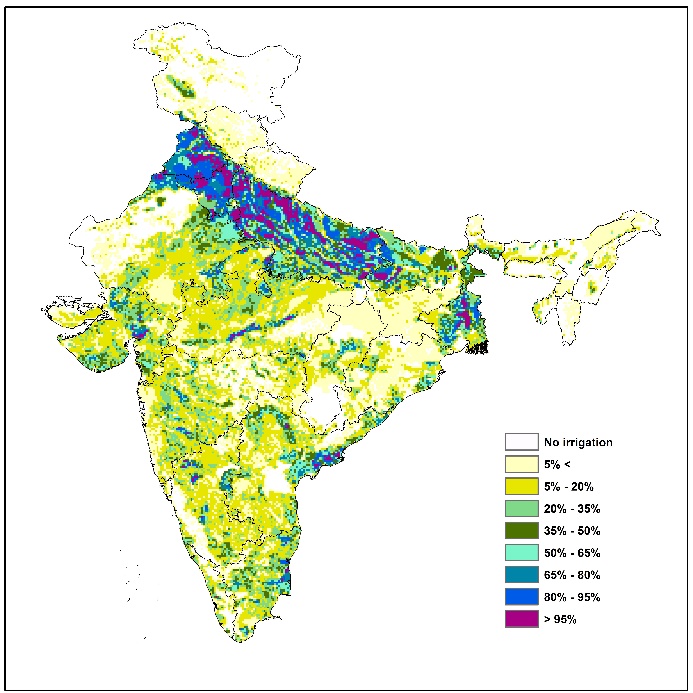

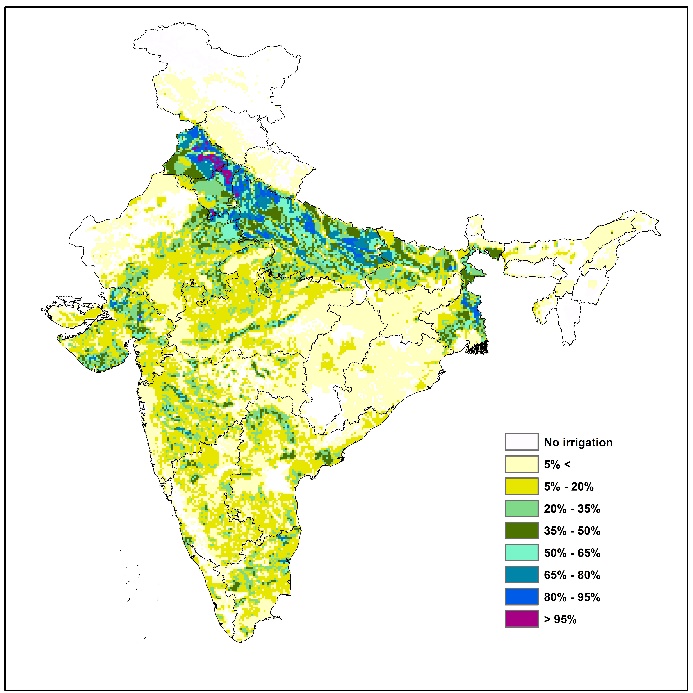


**Figure S3.** Maps of percentage of areas equipped for irrigation (left) and percentage of areas equipped for irrigation with groundwater (right) according to Siebert et al. [1].

**Standardization of the Indexes**

The involved indexes are based on monthly and multi-monthly data. The SPEI is calculated using the difference between precipitation and potential evapotranspiration (PET, Vicente-Serrano et al. [2]). The SDI is calculated using the monthly river discharge data obtained from a gridded hydrological model, scaled up at the same resolution of the SPEI i.e. 0.5° × 0.5° degrees spatial resolution. The log-logistic statistical distribution is used to model the P-PET time-series. The same procedure was used to model the runoff time-series by Shukla and Wood (2008) and here, as also the river discharge data.

The probability density function of a three parameter Log-logistic distributed variable is expressed as:

where α, β and γ are scale, shape and origin parameters, respectively. These are calculated as in Vicente-Serrano et al. [2] using the R SPEI library (https://cran.r-project.org/web/packages/SPEI/SPEI.pdf).

The probability distribution function of D according to the Log-logistic distribution is then given by:

With F(*x*) the SPEI can easily be obtained as the standardized values of F(*x*) following the classical approximation of Abramowitz and Stegun [3]. See Vicente-Serrano et al. [3] for details.


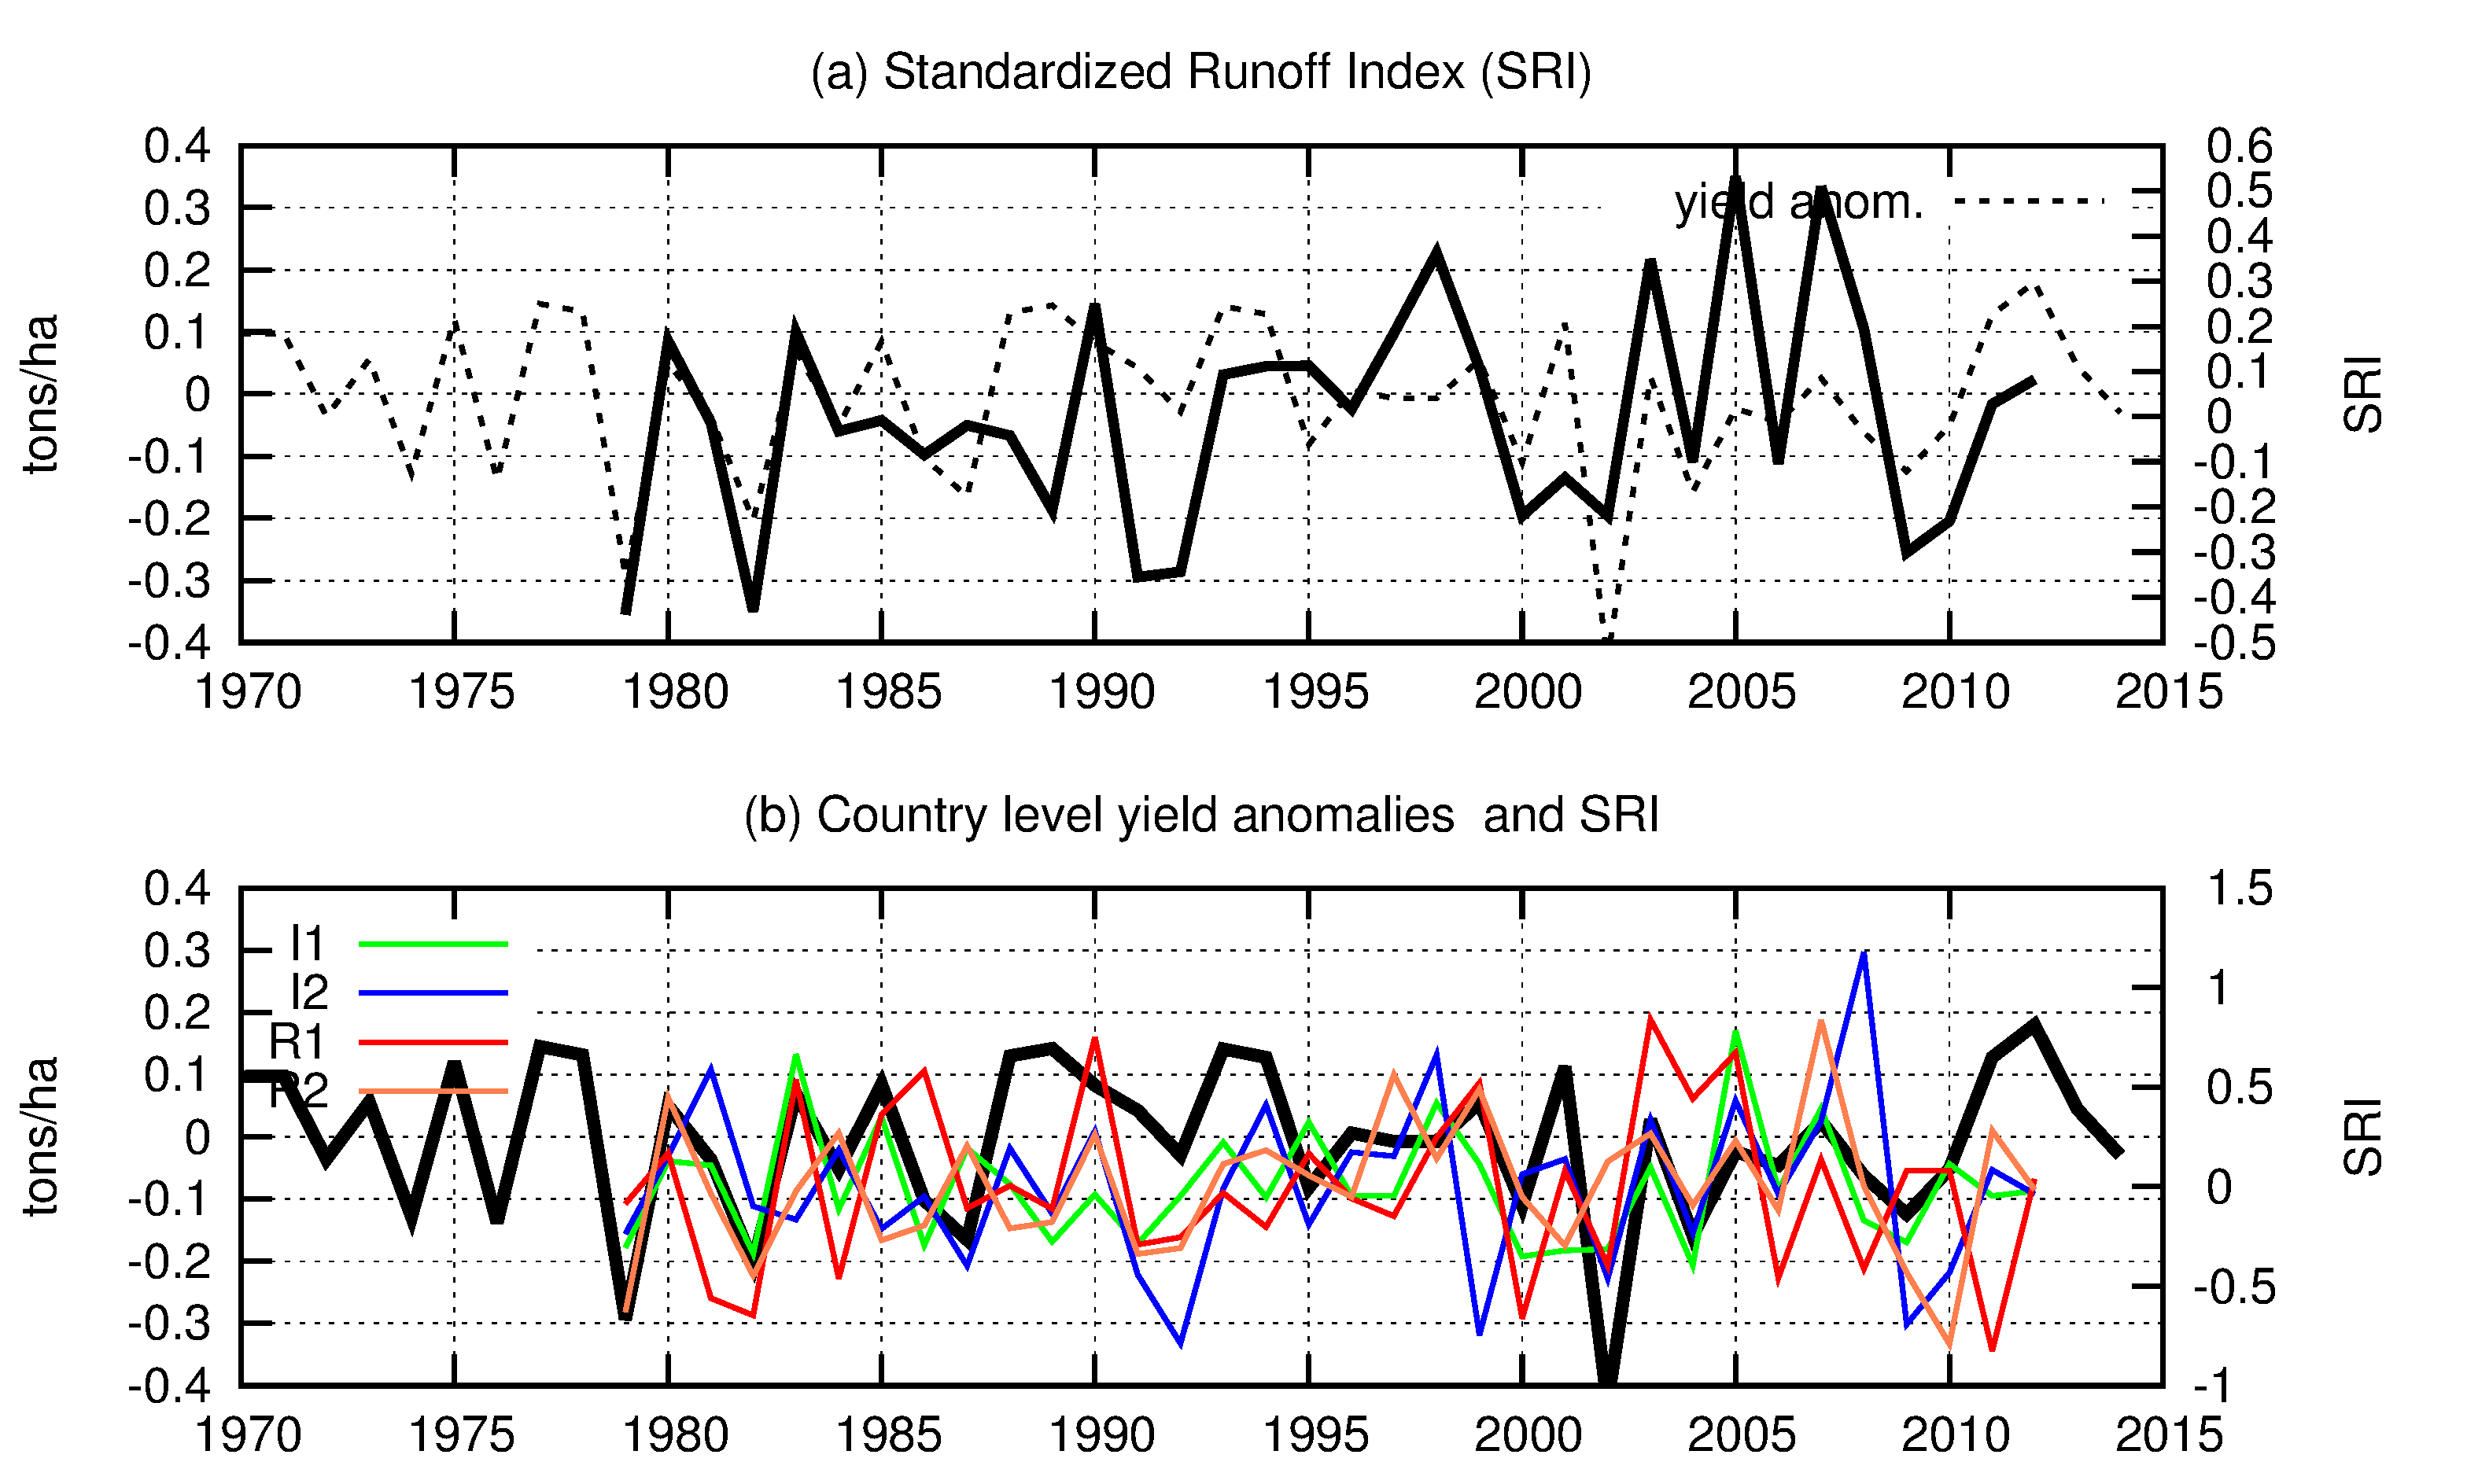


**Figure S4.** (**a**) time series of yield anomalies (dashed lines) and Standardized Runoff Index (SRI) aggregated at the national level over all cropping cycles i.e. Same as Figure 6, but for the SRI; (**b**) time series of yield anomalies (black bold line) and SRI aggregated at the country level but distinguished for cropping cycles and irrigated/rainfed regions: I1 in green, I2 in blue, R1 in red and R2 in orange i.e. same as Figure 7, but for the SRI.

Figure S4 shows the time-series of soil moisture anomalies estimated by Standardized Runoff Index (SRI) in comparison with the recorded yield anomalies. In general, the SRI is qualitatively reproducing the yield fluctuations, but it is underestimating the 2002 anomalies (Figure S3, panel a). Table S1 shows the correlation analysis of time series in Figure S3 (panel b), in comparison with the other soil moisture anomaly indexes discussed in the manuscript.

**Table S1.** Correlation analyses amongst drought indicators for each cropping season: I1–Kharif irrigated, I2–Rabi/summer irrigated, R1 and R2–Kharif rainfed/flooded.

| **Correlations** | **I1** | **I2** | **R1** | **R2** |
| --- | --- | --- | --- | --- |
| SRI - SPEI | 0.63 | 0.85 | 0.80 | 0.40 |
| SRI - SDI | 0.66 | 0.55 | 0.69 | 0.78 |
| SRI – ESACCI | 0.65 | 0.47 | 0.53 | 0.40 |
| SPEI – ESACCI | 0.44 | 0.46 | 0.47 | 0.37 |
| SDI – ESACCI | 0.51 | 0.64 | 0.60 | 0.50 |

Table S1 shows the correlations amongst soil moisture anomaly indicators computed for the four cropping cycles. Compared to the main manuscript, this comparison involved the Standardized Runoff Index (SRI, [4]), which is computed analogously to the SPEI and the SDI, but on the runoff data.

Compared to the SPEI, the SRI integrated land surface processes as modelled by HTESSEL in the GloFAS system, providing the freshwater available in the 0.5° cell and the input to the LISFLOOD river routing model.

The SRI is sometimes better correlated with the SPEI than with the SDI. However, the SRI is always better correlated with the ESA-CCI observations than the SPEI. In most cases, the SDI over performs the SRI.

**References**

1. Siebert S.; Burke J.; Faures J.M.; Frenken K.; Hoogeveen J.; Doll P.; Portmann F.T. Groundwater use for irrigation—A global inventory. *Hydrol. Earth Syst. Sci*. **2010**, *14*, 1863–1880.
2. Vicente-Serrano S.M.; Santiago Beguería; Juan I. López-Moreno. A Multi-scalar drought index sensitive to global warming: The Standardized Precipitation Evapotranspiration Index—SPEI. *J. Clim*. **2010**, *23*, 1696–1718.
3. Abramowitz, M.; I.A. Stegun. *1965: Handbook of Mathematical Functions*; Dover Publications: New York, NY, USA, 1965.
4. Shukla S.; Wood A.W. Use of a standardized runoff index for characterizing hydrologic drought. *Geophys.* *Res. Lett*. **2008**, 35, doi:10.1029/2007GL032487.
